# Supplementary material for: Leucine and ACE inhibitors as therapies for sarcopenia (LACE trial): study protocol for a randomised controlled trial
Source: Springer Nature journal article supplement (doi:10.1186/s13063-017-2390-9), 2018-01-04
Supplement: MOESM1 [file 15344996]

---

## PARTICIPANT INFORMED CONSENT FORM

LACE trial

---

### Perindopril and Leucine to improve muscle function in older people

**This form must be completed and signed by the research participant in the presence of Principal Investigator or someone from the research team designated by the Principal Investigator.**

Initials

I have read and understood the Participant Information Sheet for the LACE trial Version 4.0, 30-09-2016

Yes  No

I have spoken to Dr, Mr, Mrs, Miss

Yes  No

I have had the opportunity to discuss the study and to ask questions. All my questions have been answered to my satisfaction.

Yes  No

I agree to my GP being informed of my participation in this study.

Yes  No

I understand, and I agree, that my identifiable routine blood tests and bone scan results will be stored within the NHS clinical system and will be available to doctors looking after me in the future.

Yes  No

I understand that my participation in the study is voluntary and that I am free to leave the study at any time without having to give a reason and that this will not affect my medical care in any way.

Yes  No

I understand that relevant sections of my medical notes and data collected during the study may be looked at by the research team or from the regulatory authorities or appropriate staff from the University of Dundee or NHS Tayside or the local NHS Trust, where it is relevant to my taking part in this study. I give permission for these individuals to have access to my records.

Yes  No

I agree to be informed of any significant clinical finding found during my participation in the research project and agree that members of the research team can contact both me and my GP and inform any referral specialist required to carry out further investigations.

Yes  No

I agree that if I withdraw or I am withdrawn from the study that data already collected can be retained and included in the data analysis.

Yes  No
